# Supplementary material
Source: MDPI journal article supplement (https://www.mdpi.com/1996-1073/17/3/633)
Supplement: s1 [file s1]

## File S1

### The questionnaire used in the survey with 12 Polish Water Supply and Sewage Companies

Faculty of Infrastructure and Environment  
Czestochowa University of Technology  
Brzeźnicka 60a  
42-215 Częstochowa

The Water Supply and Sewage Company

.....

In connection with research conducted at the Faculty of Infrastructure and Environment of the Czestochowa University of Technology on water losses and ways to reduce them, I kindly ask you to provide the data specified in the tables below. This information will be used to analyze and assess water losses in various distribution systems.

If you need additional information, I am available by phone..... .

Thank you very much in advance for your help.

Yours sincerely

Signature.....

**Table S1.** The characteristics of the water distribution systems.

| Company | Length of<br>mains (primary<br>and secondary<br>feeders),<br>$L_m$<br>(km) | Length of<br>service<br>Connections<br>(main to<br>meter),<br>$L_p$<br>(km) | Number of<br>service<br>connections, $N_c$ | Average<br>pressure in the<br>network,<br>$p$<br>(m H <sub>2</sub> O) | Number<br>of serviced<br>inhabitants,<br>$IN$ |
|---------|----------------------------------------------------------------------------|-----------------------------------------------------------------------------|--------------------------------------------|-----------------------------------------------------------------------|-----------------------------------------------|
|         |                                                                            |                                                                             |                                            |                                                                       |                                               |

**Table S2.** The water balance data

| Company | Water supplied to the<br>network<br>$SIV$<br>(m <sup>3</sup> ) | Water used for the own<br>needs of the water supply<br>company<br>$UAC$<br>(m <sup>3</sup> ) | Water sold to all customers<br>$BAC$<br>(m <sup>3</sup> ) |
|---------|----------------------------------------------------------------|----------------------------------------------------------------------------------------------|-----------------------------------------------------------|
|         |                                                                |                                                                                              |                                                           |
